# Supplementary material
Source: ML conference proceedings conference paper supplement (https://openreview.net/forum?id=AuzSDvSUzg)

Different levels of HiFiC

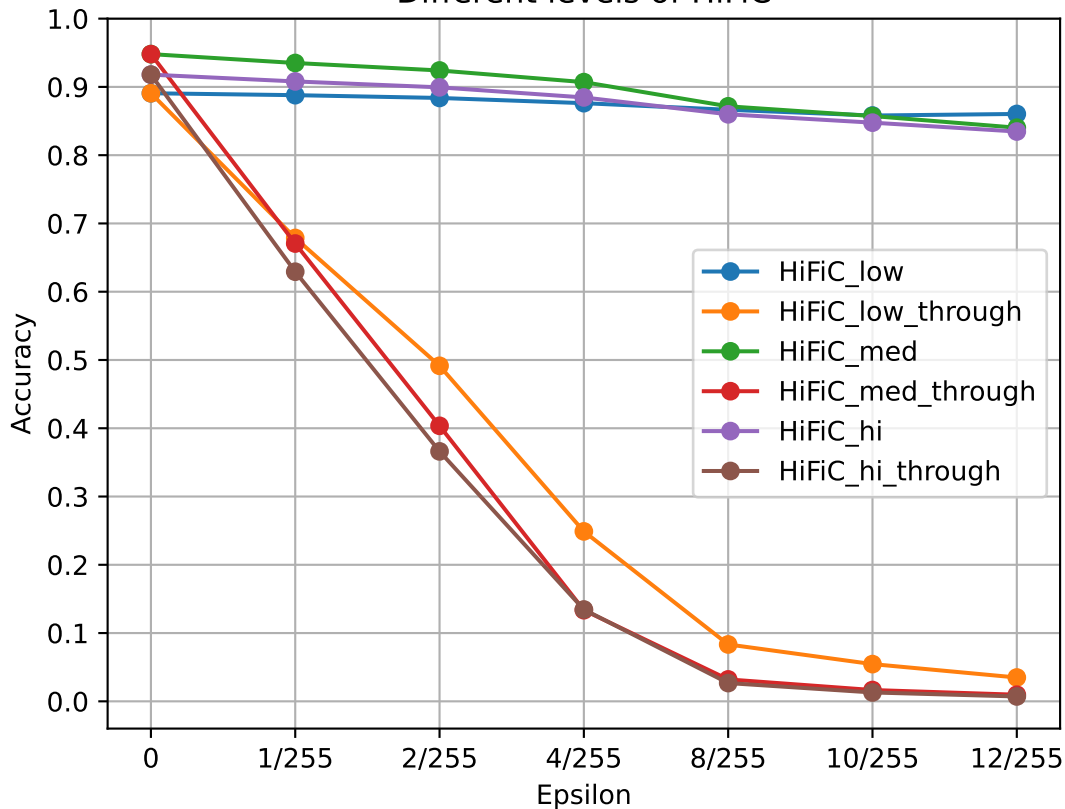

Supplement: supplementary_material [file Different_levels_of_HiFiC.pdf › image-compression-to-robustify-models-main/Different_levels_of_HiFiC.pdf]

FGSM: Different levels of HiFiC

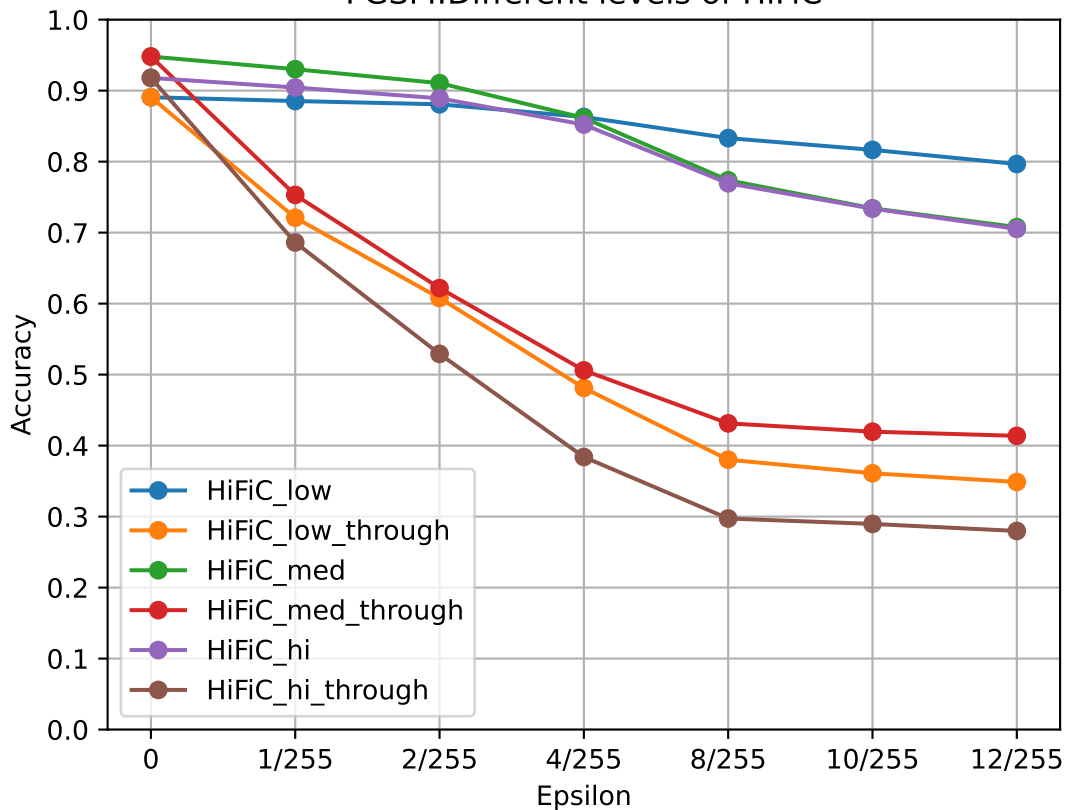

Supplement: supplementary_material [file FGSM_Different_levels_of_HiFiC.pdf › image-compression-to-robustify-models-main/FGSM_Different_levels_of_HiFiC.pdf]

FGSM: Different qualities of JPEG defense

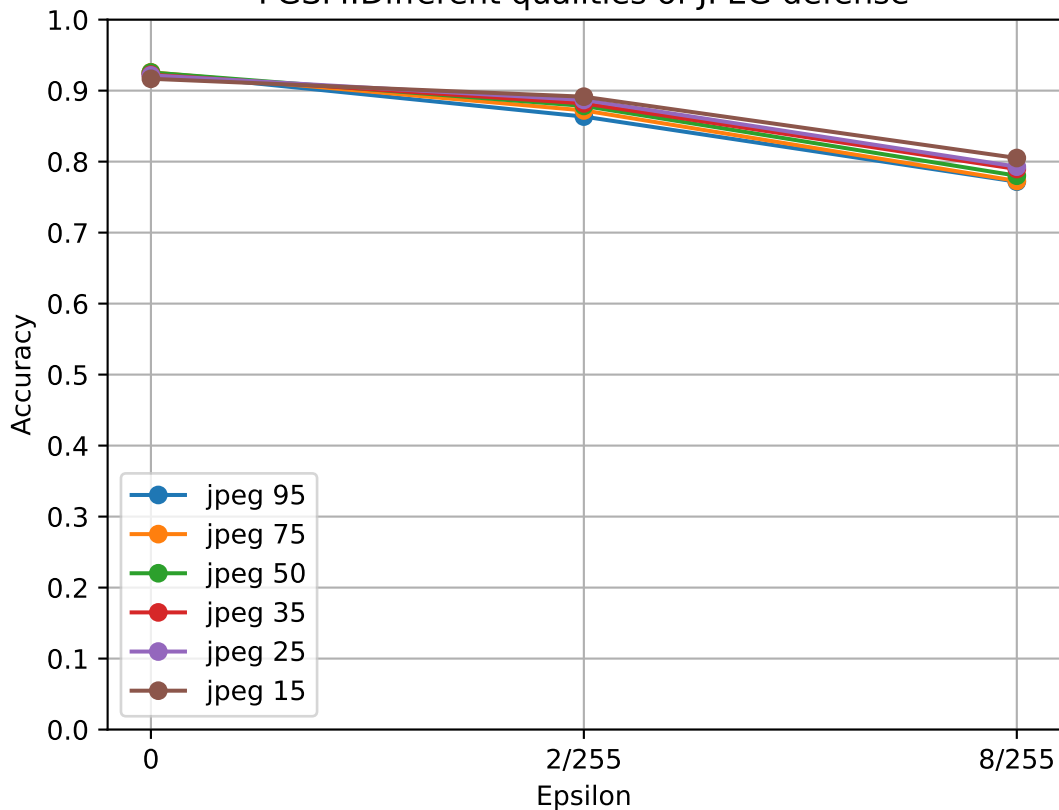

Supplement: supplementary_material [file FGSM_Different_qualities_of_JPEG_defense.pdf › image-compression-to-robustify-models-main/FGSM_Different_qualities_of_JPEG_defense.pdf]

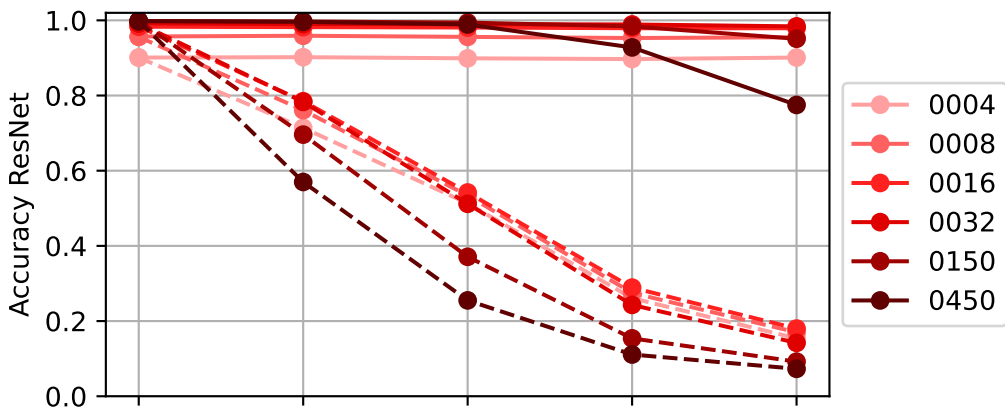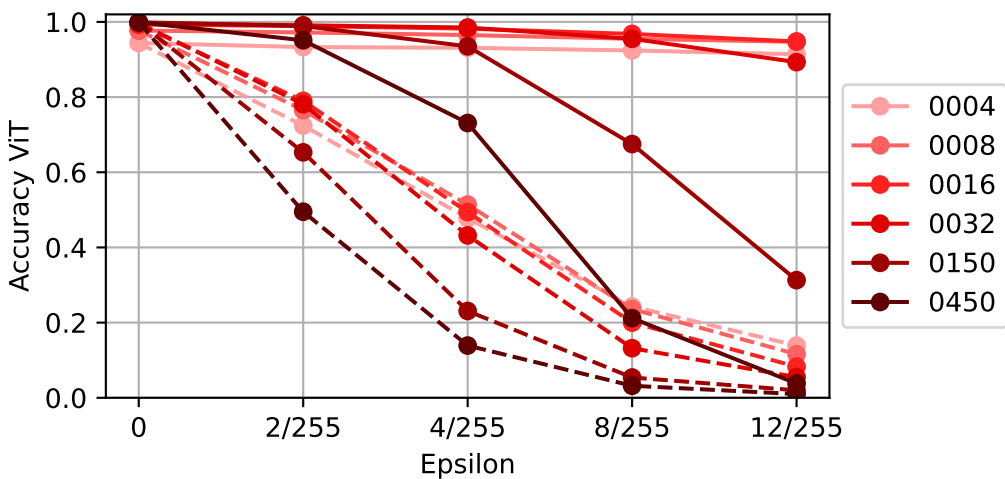

Supplement: supplementary_material [file elic_abl.pdf › image-compression-to-robustify-models-main/elic_abl.pdf]

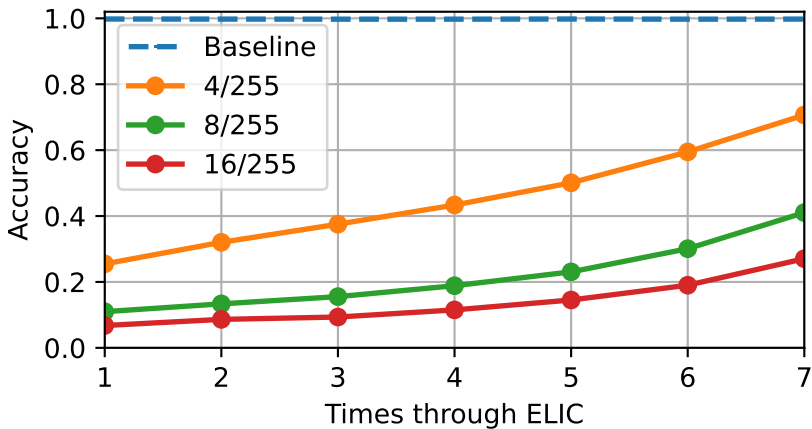

Supplement: supplementary_material [file elic_seq.pdf › image-compression-to-robustify-models-main/elic_seq.pdf]

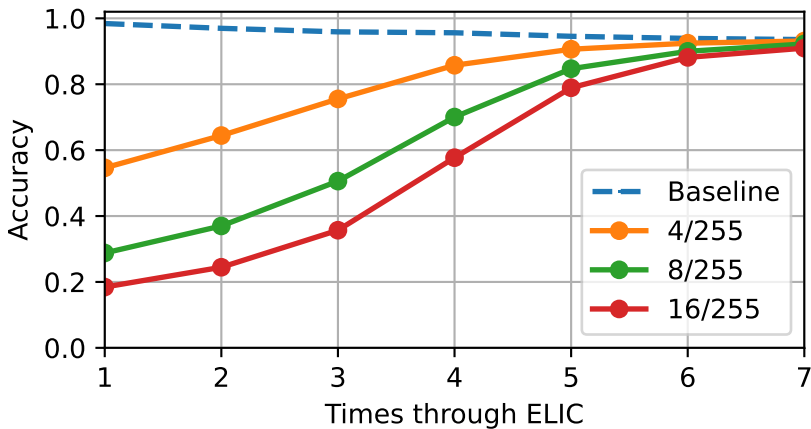

Supplement: supplementary_material [file elic_seq_low.pdf › image-compression-to-robustify-models-main/elic_seq_low.pdf]

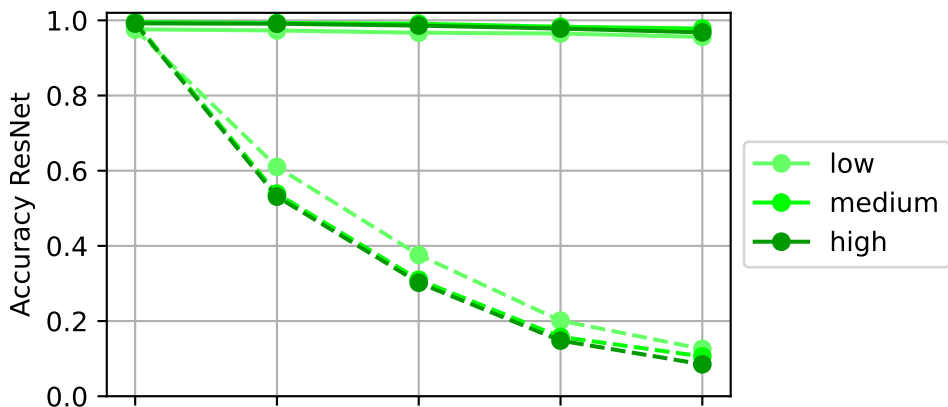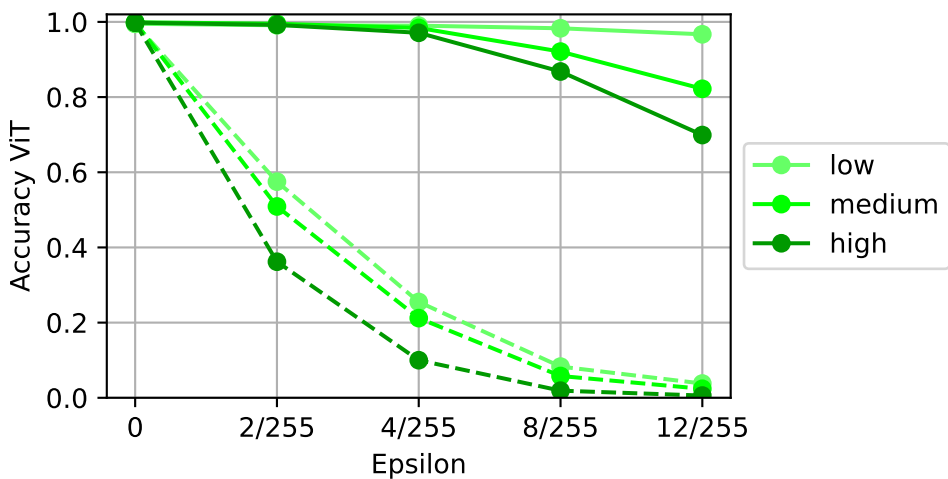

Supplement: supplementary_material [file hific_abl.pdf › image-compression-to-robustify-models-main/hific_abl.pdf]

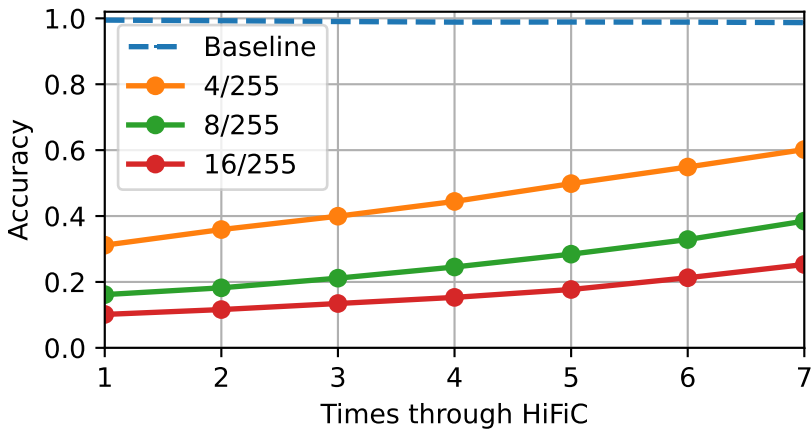

Supplement: supplementary_material [file hific_seq.pdf › image-compression-to-robustify-models-main/hific_seq.pdf]

Accuracy

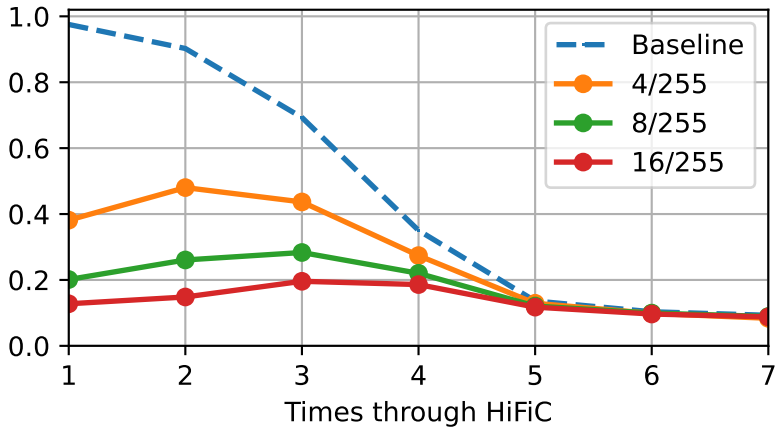

Supplement: supplementary_material [file hific_seq_low.pdf › image-compression-to-robustify-models-main/hific_seq_low.pdf]

iFGSM: Different qualities of JPEG

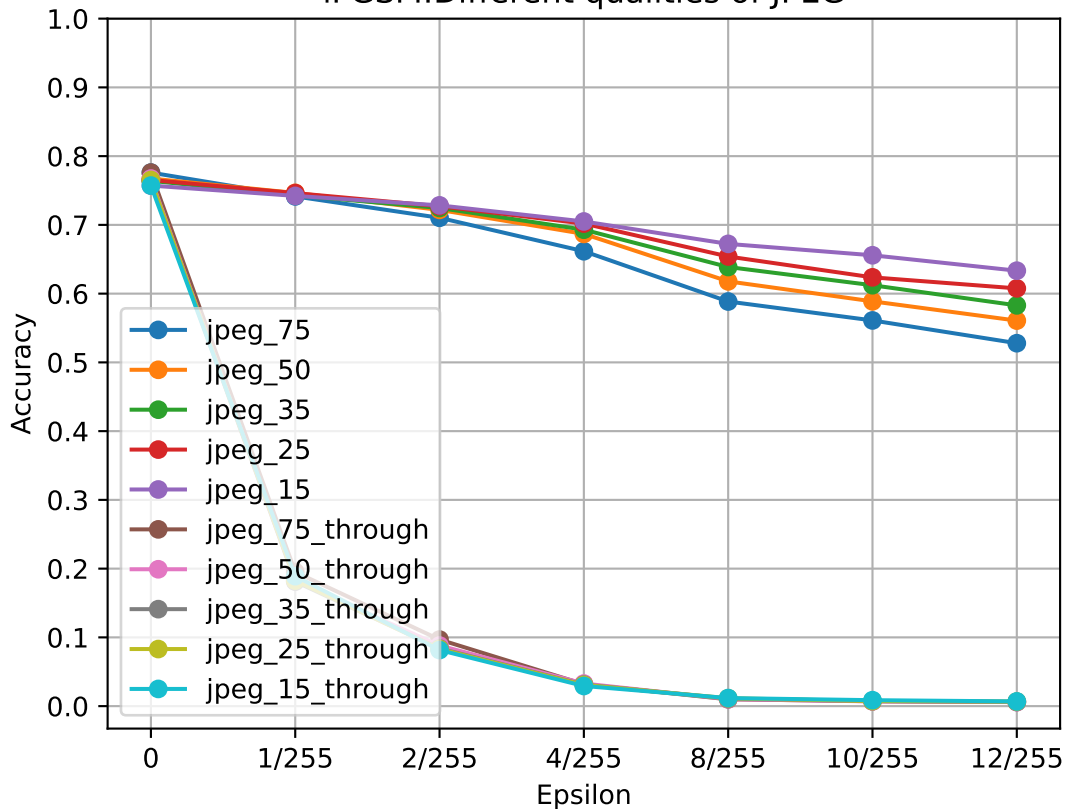

Supplement: supplementary_material [file iFGSM_Different_qualities_of_JPEG.pdf › image-compression-to-robustify-models-main/iFGSM_Different_qualities_of_JPEG.pdf]

iFGSM: Different qualities of JPEG defense

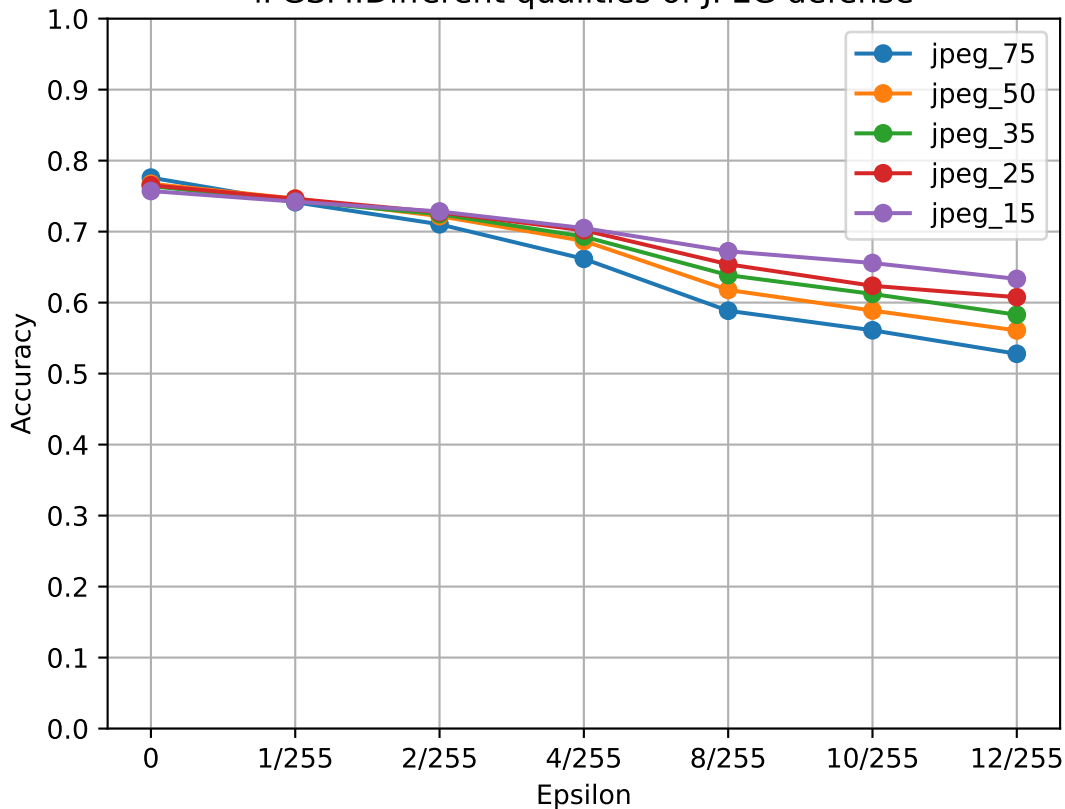

Supplement: supplementary_material [file iFGSM_Different_qualities_of_JPEG_defense.pdf › image-compression-to-robustify-models-main/iFGSM_Different_qualities_of_JPEG_defense.pdf]

iFGSM: Different qualities of JPEG through

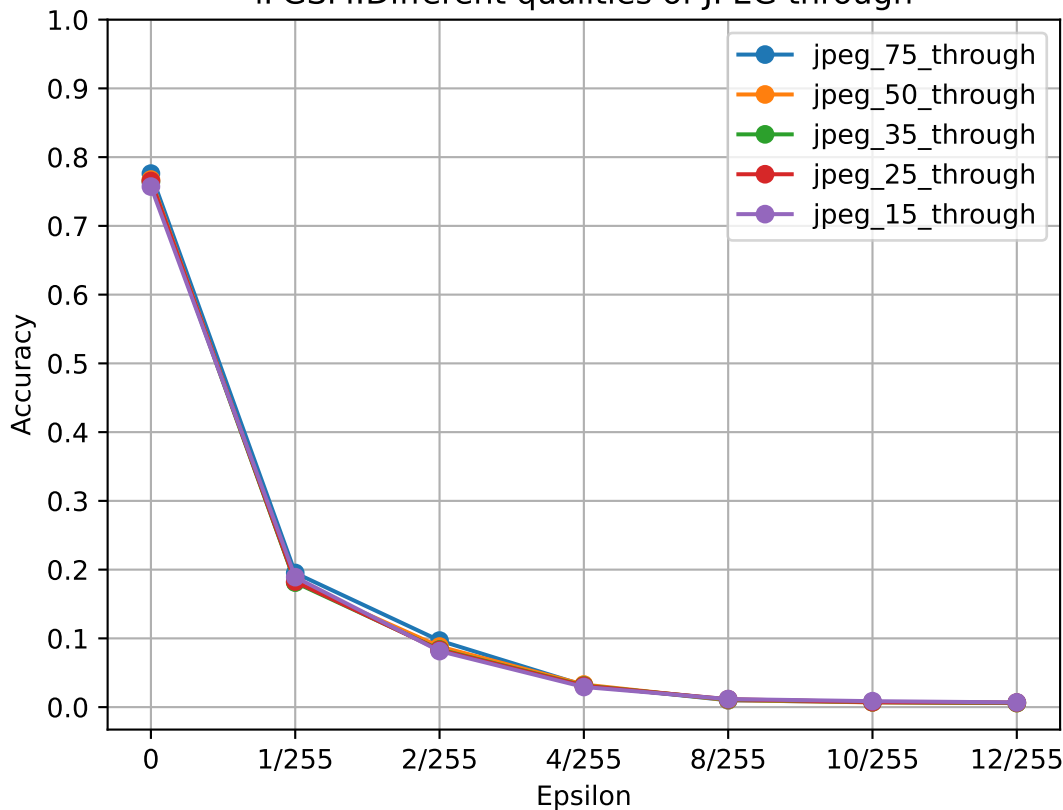

Supplement: supplementary_material [file iFGSM_Different_qualities_of_JPEG_through.pdf › image-compression-to-robustify-models-main/iFGSM_Different_qualities_of_JPEG_through.pdf]

iFGSM:HiFiC vs non diff HiFiC

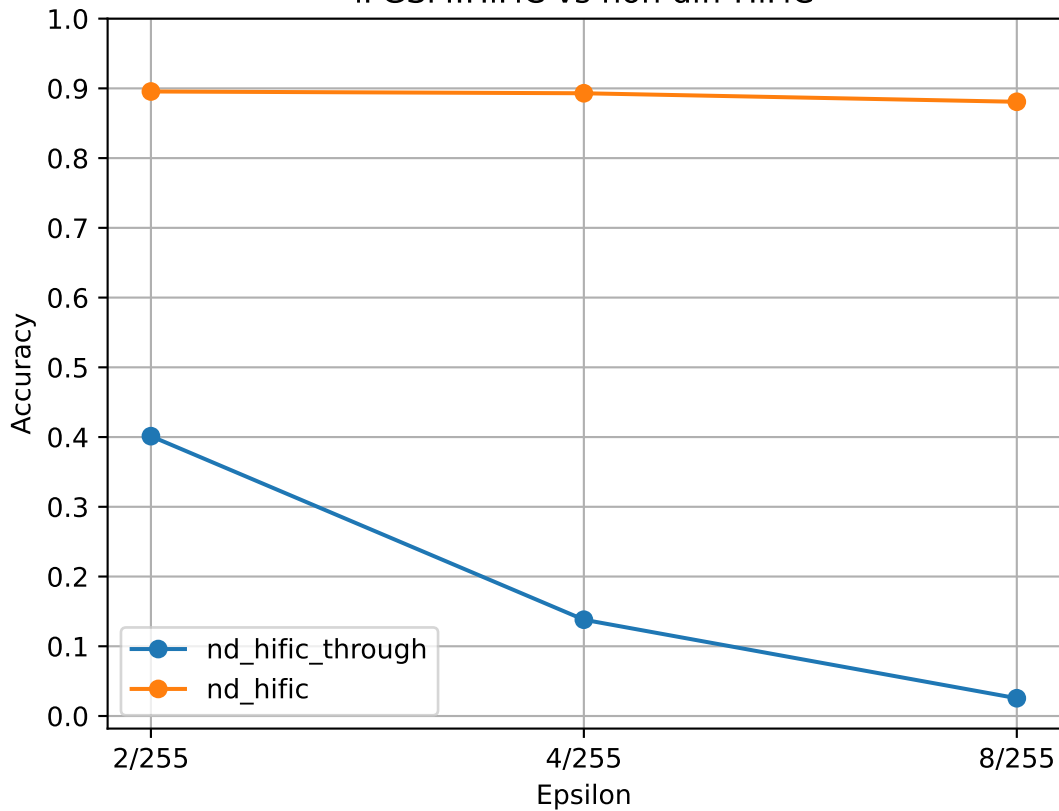

Supplement: supplementary_material [file iFGSM_HiFiC_vs_non_diff_HiFiC.pdf › image-compression-to-robustify-models-main/iFGSM_HiFiC_vs_non_diff_HiFiC.pdf]

iFGSM sequential jpeg with gradient information

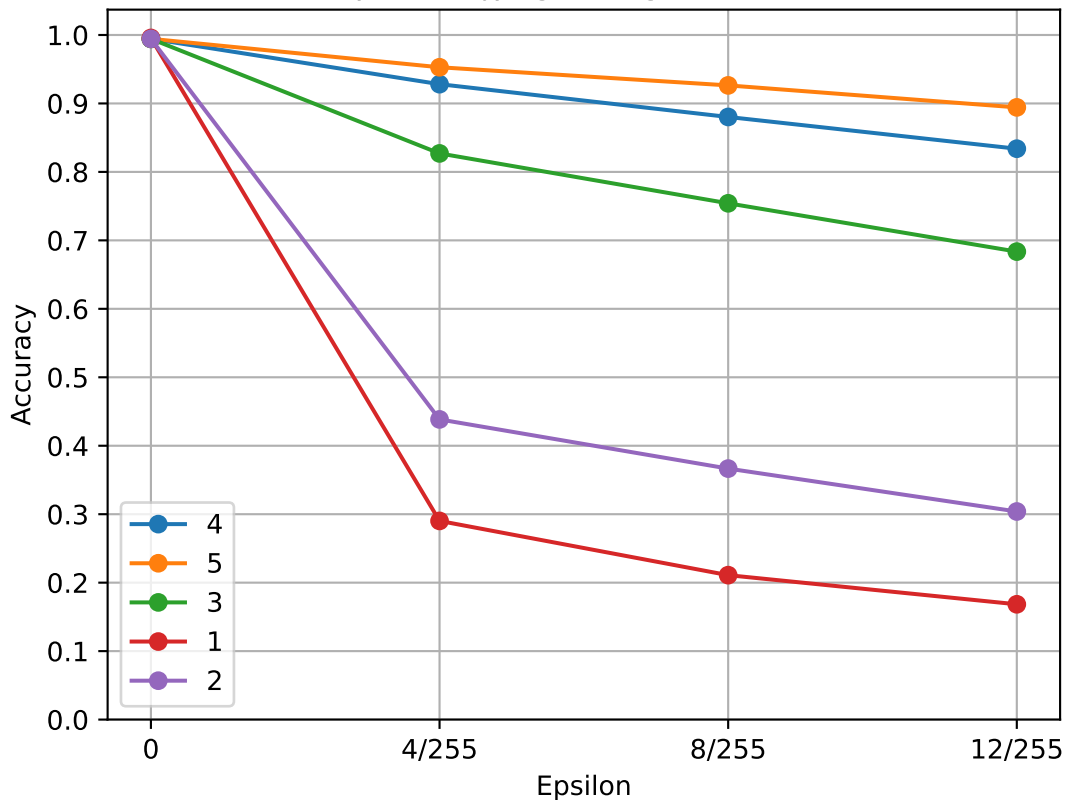

Supplement: supplementary_material [file iFGSM_sequential_jpeg_with_gradient_information.pdf › image-compression-to-robustify-models-main/iFGSM_sequential_jpeg_with_gradient_information.pdf]

Accuracy

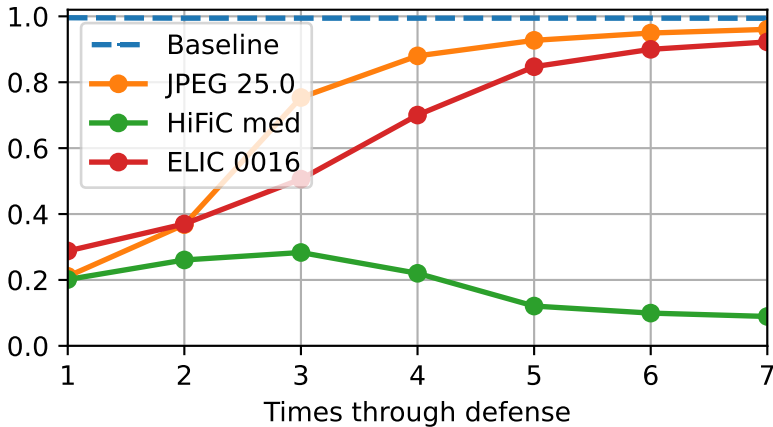

Supplement: supplementary_material [file imagnette_seq.pdf › image-compression-to-robustify-models-main/imagnette_seq.pdf]

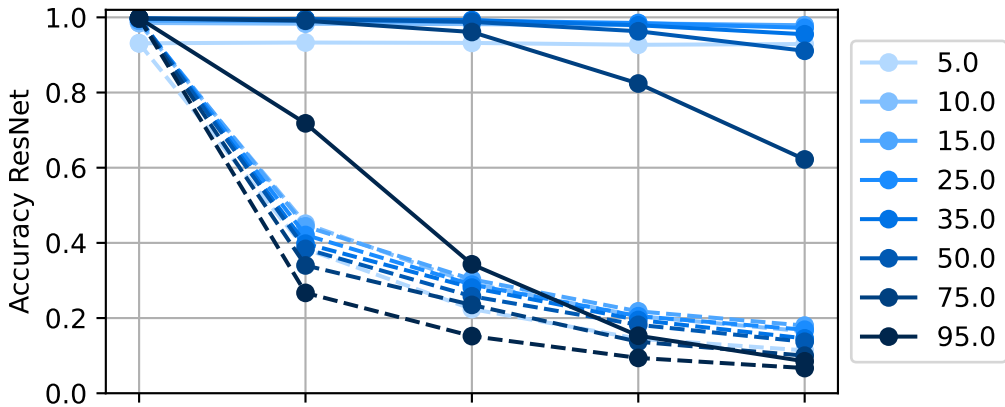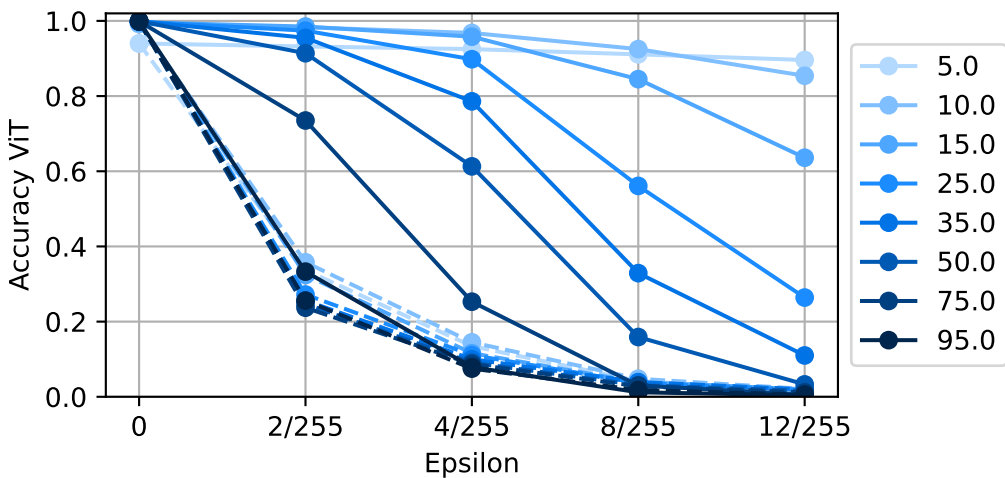

Supplement: supplementary_material [file jpeg_abl.pdf › image-compression-to-robustify-models-main/jpeg_abl.pdf]

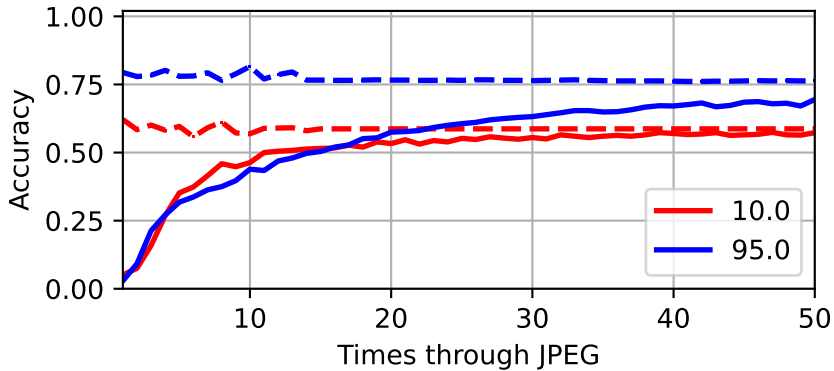

Supplement: supplementary_material [file jpeg_seq_imagenet_deep.pdf › image-compression-to-robustify-models-main/jpeg_seq_imagenet_deep.pdf]

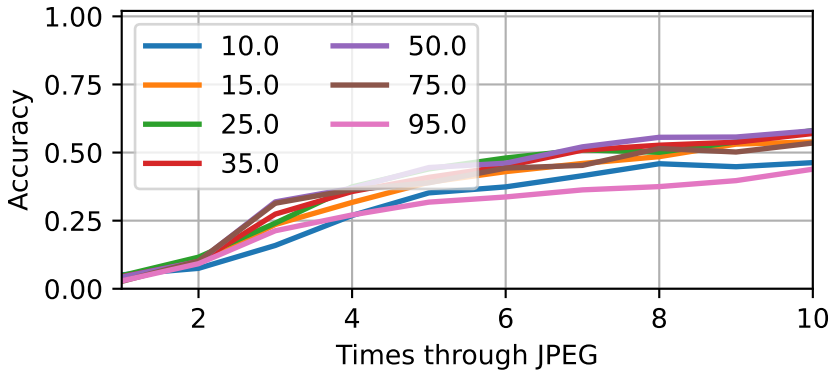

Supplement: supplementary_material [file jpeg_seq_imagenet_rn_qs.pdf › image-compression-to-robustify-models-main/jpeg_seq_imagenet_rn_qs.pdf]

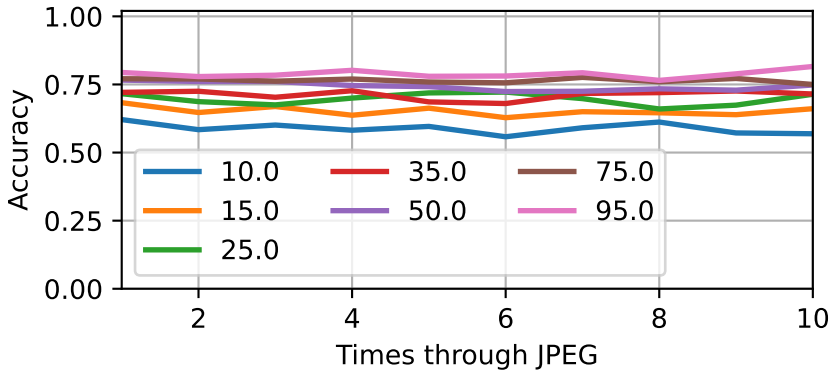

Supplement: supplementary_material [file jpeg_seq_imagenet_rn_qs_base.pdf › image-compression-to-robustify-models-main/jpeg_seq_imagenet_rn_qs_base.pdf]

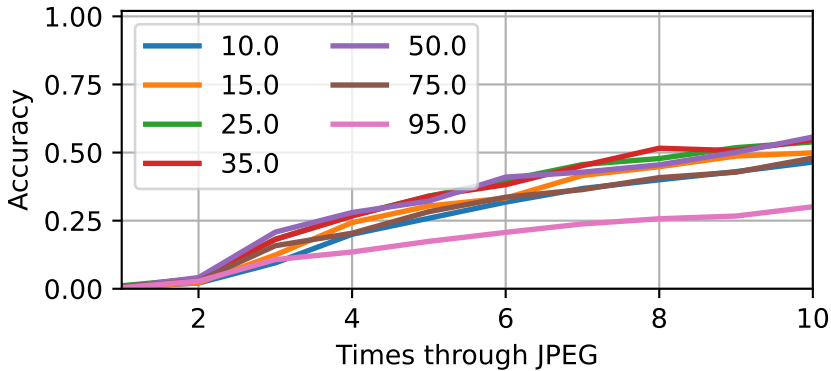

Supplement: supplementary_material [file jpeg_seq_imagenet_vit_qs.pdf › image-compression-to-robustify-models-main/jpeg_seq_imagenet_vit_qs.pdf]

Accuracy

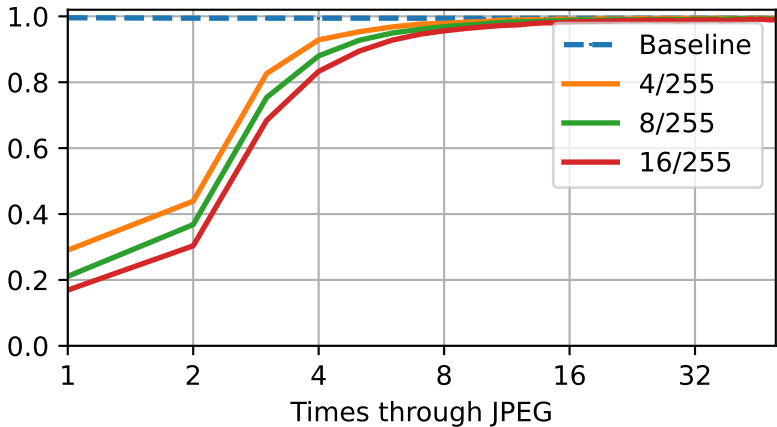

Supplement: supplementary_material [file jpeg_seq_large.pdf › image-compression-to-robustify-models-main/jpeg_seq_large.pdf]

Accuracy

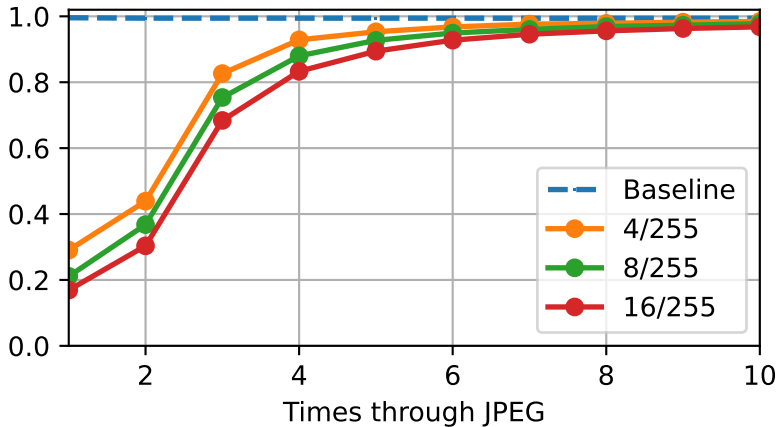

Supplement: supplementary_material [file jpeg_seq_small.pdf › image-compression-to-robustify-models-main/jpeg_seq_small.pdf]

ResNet50

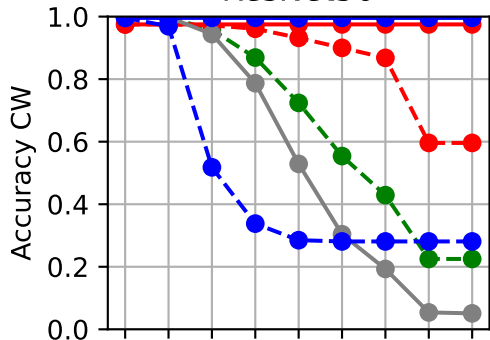

ViT

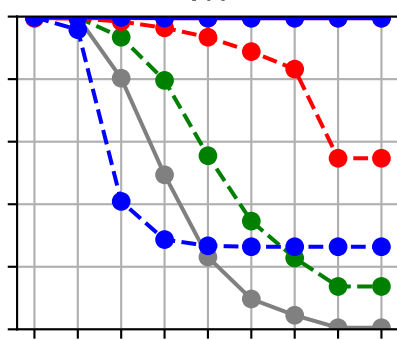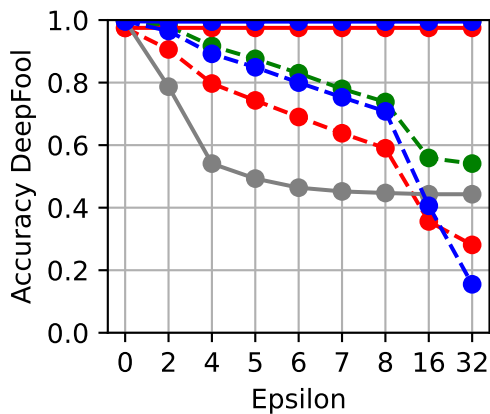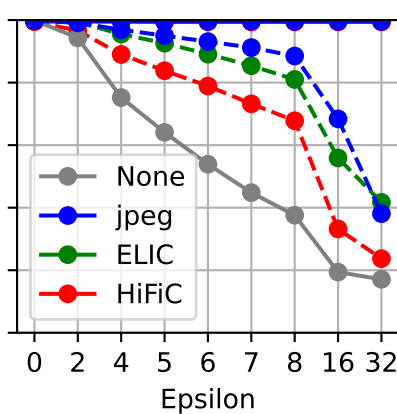

Supplement: supplementary_material [file l_2.pdf › image-compression-to-robustify-models-main/l_2.pdf]

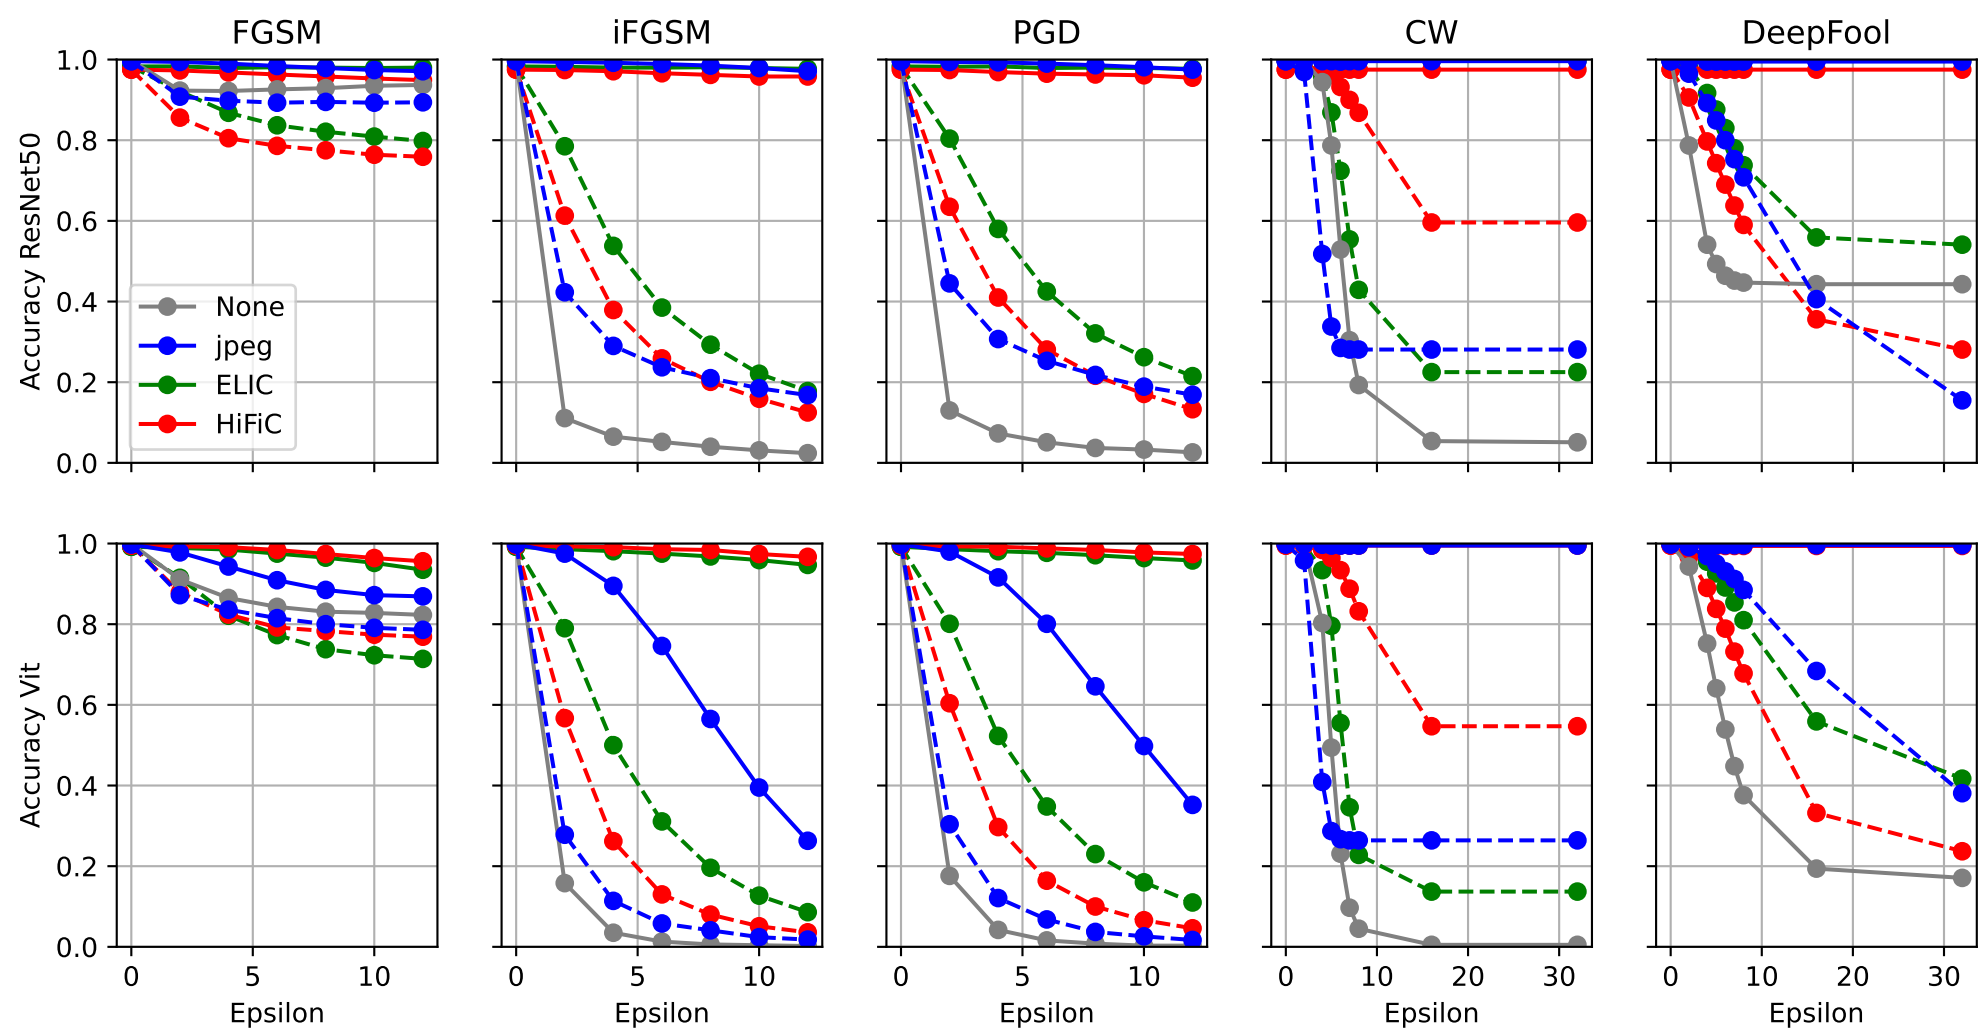

Supplement: supplementary_material [file l_all.pdf › image-compression-to-robustify-models-main/l_all.pdf]

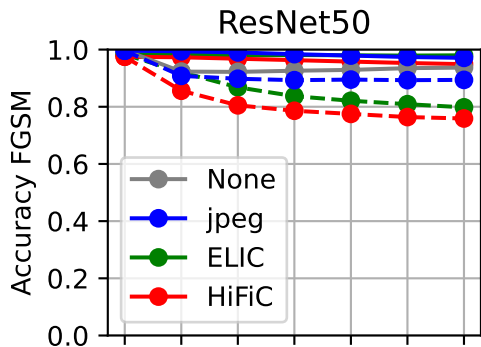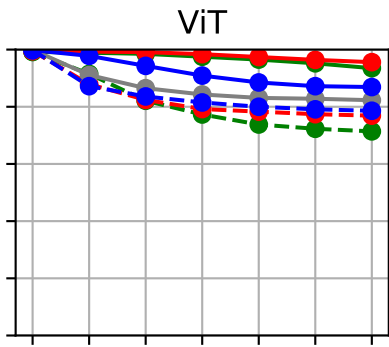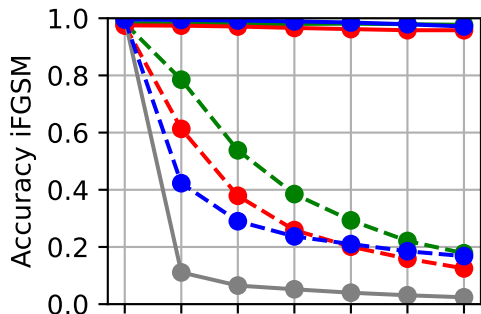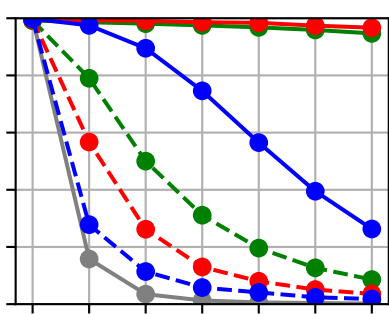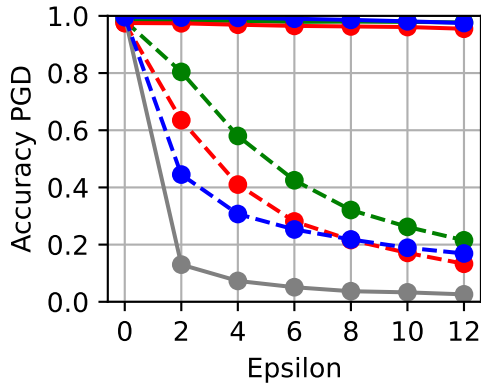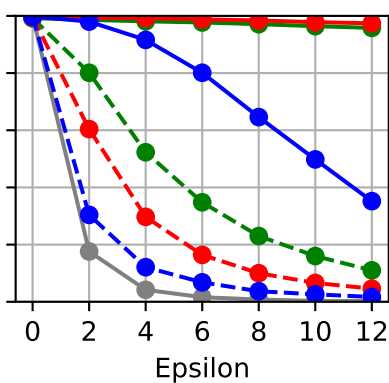

Supplement: supplementary_material [file l_inf.pdf › image-compression-to-robustify-models-main/l_inf.pdf]

ResNet50

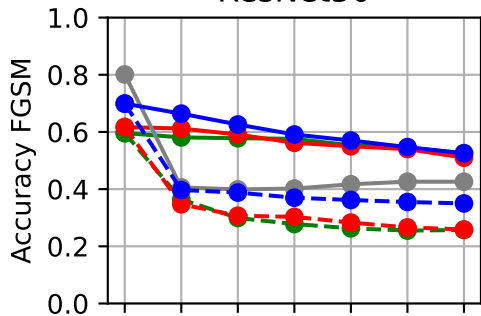

ViT

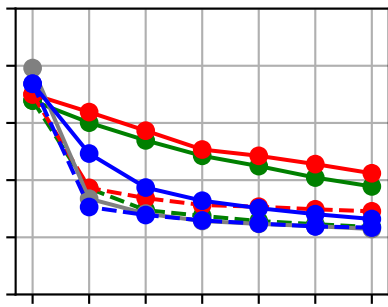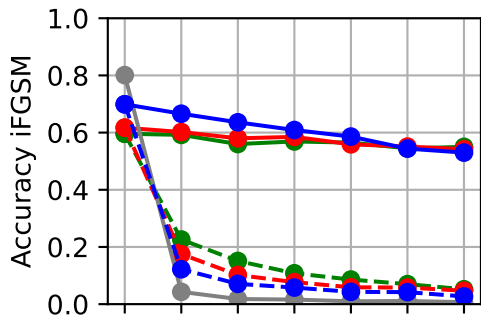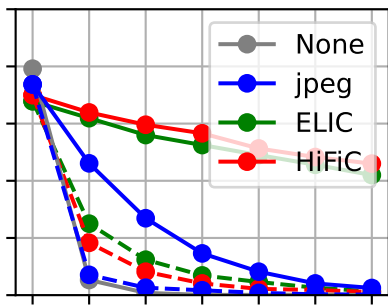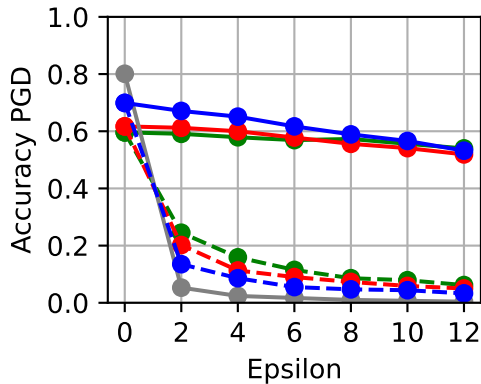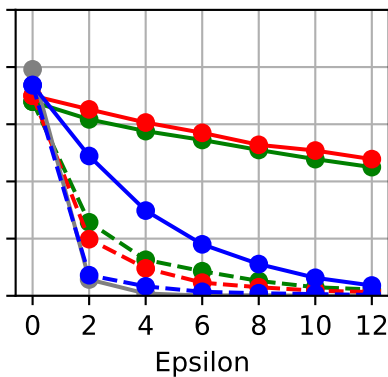

Supplement: supplementary_material [file l_inf_1000.pdf › image-compression-to-robustify-models-main/l_inf_1000.pdf]

Accuracy for iFGSM for different N of JPEG compression in sequence

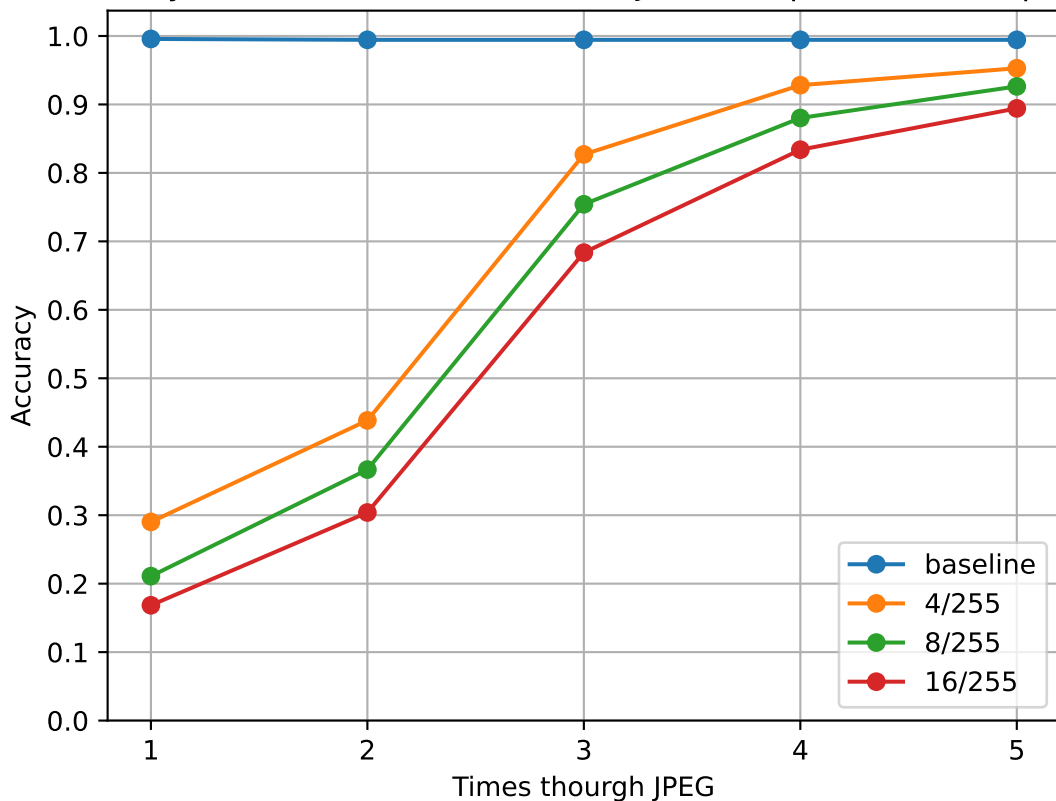

Supplement: supplementary_material [file sequential_jpeg.pdf › image-compression-to-robustify-models-main/sequential_jpeg.pdf]
